# Supplementary material
Source: MDPI journal article supplement (https://www.mdpi.com/1424-2818/14/12/1035)
Supplement: s1 [file s1]

# Land-Use Types Influence the Community Composition of Soil Mesofauna in the Coastal Zones of Bohai Bay, China

Xiaoxue Zheng <sup>1</sup>, Yan Tao <sup>1,2,\*</sup>, Zhongqiang Wang <sup>1</sup>, Xinchang Kou <sup>1</sup>, Haixia Wang <sup>1</sup>,  
Shengzhong Wang <sup>1</sup> and Donghui Wu <sup>3</sup>

<sup>1</sup>Key Laboratory of Geographical Processes and Ecological Security in Changbai Mountains,  
Ministry of Education, School of Geographical Sciences, Northeast Normal University,  
Changchun 130024, China

<sup>2</sup>Jilin Provincial Key Laboratory of Animal Resource Conservation and Utilization, Northeast  
Normal University, Changchun 130117, China

<sup>3</sup>Key Laboratory of Wetland Ecology and Environment, Northeast Institute of Geography  
and Agroecology, Chinese Academy of Sciences, Changchun 130102, China

\* Correspondence: taoy431@nenu.edu.cn (Y.T.)

**Supporting Information containing 2 Tables (Table S1, S2).**

## **Table S1**

Habitat characteristics of the five land-use types..... 2

## **Table S2**

The amounts and abundance ratios of soil mesofauna in the five land-use types..... 3

**Table S1**

Habitat characteristics of the five land-use types.

|                            |                     | Land-use types            |                        |                           |                            |                             |
|----------------------------|---------------------|---------------------------|------------------------|---------------------------|----------------------------|-----------------------------|
|                            |                     | Cotton fields             | Jujube trees           | Ash trees                 | Saline meadow              | Wetlands                    |
| Habitat properties         |                     | Croplands                 | Artificial trees       | Artificial trees          | Unused lands               | Unused lands                |
| Human disturbance          | Fertilizers (n/a)   | > 4                       | > 2                    | -                         | -                          | -                           |
|                            | Herbicides (n/a)    | > 4                       | 2                      | -                         | -                          | -                           |
|                            | Ploughs (n/a)       | > 2                       | 1                      | -                         | -                          | -                           |
|                            | Irrigation (n/a)    | > 6                       | > 3                    | 2~3                       | -                          | -                           |
|                            | Intensities         | +++                       | ++                     | +                         | -                          | -                           |
| Vegetation characteristics | Dominant species    | <i>Gossypium hirsutum</i> | <i>Ziziphus jujuba</i> | <i>Fraxinus chinensis</i> | <i>Imperata cylindrica</i> | <i>Phragmites australis</i> |
|                            | Average heights (m) | 0.40                      | 2.50                   | 10.00                     | 0.40~0.80                  | 2.00                        |
|                            | Coverage (%)        | 85                        | 35                     | 6                         | 65                         | 90                          |

+++; severe human disturbance; ++, moderate human disturbance; +, slight human disturbance; -, without human disturbance.

**Table S2**

The amounts and abundance ratios of soil mesofauna in the five land-use types.

| Taxa of soil<br>mesofauna | Cotton fields |                    | Jujube trees |                    | Ash trees |                    | Saline meadow |                    | Wetlands |                    | Total  |                    |
|---------------------------|---------------|--------------------|--------------|--------------------|-----------|--------------------|---------------|--------------------|----------|--------------------|--------|--------------------|
|                           | Amount        | Abundance<br>ratio | Amount       | Abundance<br>ratio | Amount    | Abundance<br>ratio | Amount        | Abundance<br>ratio | Amount   | Abundance<br>ratio | Amount | Abundance<br>ratio |
| Actinedida                | 857           | +++                | 529          | +++                | 151       | +++                | 268           | +++                | 292      | +++                | 2097   | +++                |
| Oribatida                 | 170           | +++                | 251          | +++                | 112       | +++                | 234           | +++                | 54       | ++                 | 821    | +++                |
| Gamasida                  | 28            | ++                 | 108          | +++                | 87        | ++                 | 89            | ++                 | 22       | ++                 | 334    | ++                 |
| Isotomidae                | 153           | +++                | 3            |                    | 22        | ++                 | 81            | ++                 | 7        | +                  | 266    | ++                 |
| Onychiuridae              | 167           | +++                | 21           | ++                 | 10        | ++                 | 315           | +++                | 18       | ++                 | 531    | ++                 |
| Neanuridae                | 0             |                    | 1            |                    | 2         |                    | 0             |                    | 0        |                    | 3      | +                  |
| Pseudachorutidae          | 4             | +                  | 8            | +                  | 0         |                    | 1             | +                  | 1        | +                  | 14     | +                  |
| Hypogastruridae           | 2             | +                  | 11           | ++                 | 1         | +                  | 9             | +                  | 2        | +                  | 25     | +                  |
| Sminthuridae              | 15            | ++                 | 0            |                    | 26        | ++                 | 48            | ++                 | 49       | ++                 | 138    | ++                 |
| Entomobryidae             | 4             | +                  | 33           | ++                 | 398       | +++                | 56            | ++                 | 33       | ++                 | 524    | ++                 |
| Cyphoderidae              | 1             | +                  | 1            | +                  | 0         |                    | 1             | +                  | 0        |                    | 3      | +                  |
| Formicidae                | 0             |                    | 5            | +                  | 13        | ++                 | 4             | +                  | 23       | ++                 | 45     | +                  |
| Staphylinidae             | 3             | +                  | 6            | +                  | 26        | ++                 | 1             | +                  | 29       | ++                 | 65     | ++                 |
| Carabidae                 | 2             | +                  | 1            | +                  | 0         |                    | 2             | +                  | 0        |                    | 5      | +                  |
| Scaphidiidae              | 0             |                    | 0            |                    | 0         |                    | 0             |                    | 1        | +                  | 1      | +                  |
| Scarabaeidae              | 4             | +                  | 0            |                    | 0         |                    | 0             |                    | 0        |                    | 4      | +                  |
| Aphodiidae                | 1             | +                  | 2            | +                  | 0         |                    | 5             | +                  | 1        | +                  | 9      | +                  |
| Coccinellidae             | 0             |                    | 1            | +                  | 0         |                    | 0             |                    | 2        | +                  | 3      | +                  |

|                   |      |      |     |    |      |   |      |      |
|-------------------|------|------|-----|----|------|---|------|------|
| Elateridae        | 0    | 0    | 1   | +  | 0    | 0 | 1    | +    |
| Cantharidae       | 0    | 0    | 1   | +  | 0    | + | 3    | +    |
| Cicindelidae      | 0    | 0    | 0   |    | 1    | + | 0    | +    |
| Chrysomelidae     | 0    | 0    | 0   |    | 1    | + | 1    | +    |
| Aphidoidea        | 2    | +    | 0   | ++ | 1    | + | 14   | ++   |
| Cicadidae         | 0    | 2    | +   | 0  | 1    | + | 1    | +    |
| Linyphiidae       | 11   | +    | 0   | +  | 0    |   | 5    | +    |
| Scolopendrellidae | 5    | +    | 21  | ++ | 0    | 2 | +    | 28   |
| Geophilidae       | 5    | +    | 4   | +  | 0    | 0 | 2    | +    |
| Japygidae         | 16   | ++   | 49  | ++ | 7    | + | 20   | ++   |
| Enchytraeidae     | 0    | 0    | 3   | +  | 0    |   | 0    | +    |
| Trachelipidae     | 0    | 0    | 0   |    | 1    | + | 0    | +    |
| Armadillidiidae   | 0    | 0    | 0   |    | 0    |   | 19   | ++   |
| Gammaridae        | 0    | 0    | 0   |    | 0    |   | 107  | ++   |
| Aristocera        | 2    | +    | 0   | +  | 8    | + | 26   | ++   |
| Brachycera        | 0    | 0    | 0   |    | 0    |   | 481  | +++  |
| Total             | 1452 | 1057 | 884 |    | 1149 |   | 1193 | 5735 |

+++, dominant taxa (relative abundance > 10%); ++, common taxa (1% ≤ relative abundance ≤ 10%); +, rare taxa (relative abundance < 1%).
